# Supplementary material
Source: Springer Nature journal article supplement (https://www.springermedizin.de/resource/supplementary/12916_2010_422_MOESM16_ESM.pdf/9599922)

**Study name****Subgroup within study****Statistics for each study****Difference in means and 95% CI**

|                        |       | Difference<br>in means | Lower<br>limit | Upper<br>limit |
|------------------------|-------|------------------------|----------------|----------------|
| Hellenius et al., 1993 | none  | -0.4                   | -0.9           | 0.2            |
| McAuley et al., 2002   | none  | -5.0                   | -5.5           | -4.6           |
| Miller et al., 2002    | none  | -5.0                   | -8.0           | -2.0           |
| Nieman et al., 2002    | none  | -2.3                   | -2.8           | -1.9           |
| Stefanick et al., 1998 | men   | 0.6                    | -1.4           | 2.6            |
| Stefanick et al., 1998 | women | -2.1                   | -4.7           | 0.5            |
| Wood et al., 1991      | men   | 7.3                    | 6.9            | 7.8            |
| Wood et al., 1991      | women | 2.7                    | 2.1            | 3.3            |
|                        |       | -0.5                   | -4.0           | 3.1            |

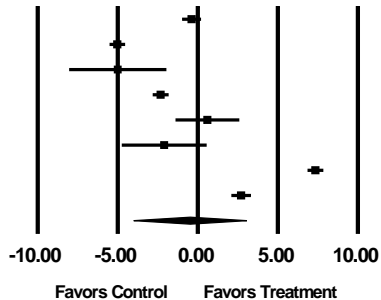

Supplement: MOESM16 [file 9599922]
